# Supplementary material for: Rutaecarpine induces the differentiation of triple-negative breast cancer cells through inhibiting fumarate hydratase
Source: Springer Nature journal article supplement (doi:10.1186/s12967-023-04396-w), 2023-08-18
Supplement: MOESM2 [file 25937120]

**Supplementary Table S1**

| <b>qRT-PCR primers used in this study</b> |                         |                         |
|-------------------------------------------|-------------------------|-------------------------|
| <b>Gene name</b>                          | <b>Forward</b>          | <b>Reverse</b>          |
| KRT8                                      | CAGAAGTCCTACAAGGTGTCCA  | CTCTGGTTGACCGTAACTGCG   |
| KRT18                                     | GGCATCCAGAACGAGAAGGAG   | ATTGTCCACAGTATTTGCGAAGA |
| VIM                                       | AGGCAAAGCAGGAGTCCACTGA  | ATCTGGCGTTCCAGGGACTCAT  |
| EPCAM                                     | GCCAGTGTACTTCAGTTGGTGC  | CCCTTCAGGTTTTGCTCTTCTCC |
| CDH1                                      | GCCTCCTGAAAAGAGAGTGGAAG | TGGCAGTGTCTCTCCAAATCCG  |
| GATA3                                     | ACCACAACCACACTCTGGAGGA  | TCGGTTTCTGGTCTGGATGCCT  |
| KRT19                                     | AGCTAGAGGTGAAGATCCGCGA  | GCAGGACAATCCTGGAGTTCTC  |
| ACTB                                      | CACCATTGGCAATGAGCGGTTC  | AGGTCTTTGCGGATGTCCACGT  |
